# Supplementary material for: Phytofabricated ZnO-NPs mediated by Hibiscus tiliaceus leaf extract and its potential as a diosgenin delivery vehicle
Source: Royal Society of Chemistry journal article supplement (doi:10.1039/d4ra03249g), 2024-01-01
Supplement: d4ra03249g1.pdf [file d4ra03249g1.pdf]

## Phytofabricated ZnO-NPs mediated by *Hibiscus tiliaceus* leaf extract and its potential as a diosgenin delivery vehicle

Oktavina Kartika Putri(0000-0001-6599-0648)<sup>ab</sup>, Lina Oktavia Rahayu<sup>b</sup>, Yuly Kusumawati(0000-0002-2079-3584)<sup>\*a</sup>, Arif Fadlan(0000-0002-6138-4015)<sup>a</sup>, Riki Subagyo(0000-0002-7622-9114)<sup>a</sup> and Mardi Santoso(0000-0003-0636-8386)<sup>a</sup>

<sup>a</sup>Department of Chemistry, Institut Teknologi Sepuluh Nopember, Surabaya, 60111, Indonesia. E-mail: y\_kusumawati@chem.its.ac.id

<sup>b</sup>Department of Pharmacy, Politeknik Kesehatan Putra Indonesia Malang, Malang, 65122, Indonesia.

### SUPPLEMENTARY INFORMATION

| Zinc precursors | Extraction solvents for <i>H. tiliaceus</i> leaf                                                 |                                                                                                  |                                                                                                    |
|-----------------|--------------------------------------------------------------------------------------------------|--------------------------------------------------------------------------------------------------|----------------------------------------------------------------------------------------------------|
|                 | Ethanol                                                                                          | Methanol                                                                                         | Distilled water                                                                                    |
| Zinc chloride   | ZnO-HLEEC<br>  | ZnO-HLMEC<br>  | ZnO-HLWEC<br>  |
| Zinc acetate    | ZnO-HLEEA<br> | ZnO-HLMEA<br> | ZnO-HLWEA<br> |
| Zinc nitrate    | ZnO-HLEEN<br> | ZnO-HLMEN<br> | ZnO-HLWEN<br> |

Supplementary file 1. Nomenclature and morphology of 9 types of ZnO-NPs.

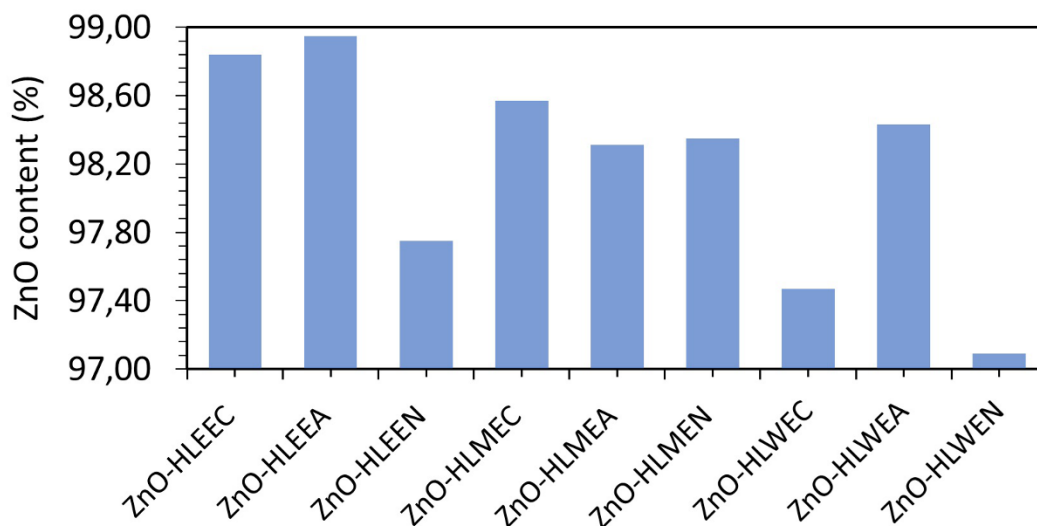

Supplementary file 2. XRF results of 9 types of ZnO-NPs.

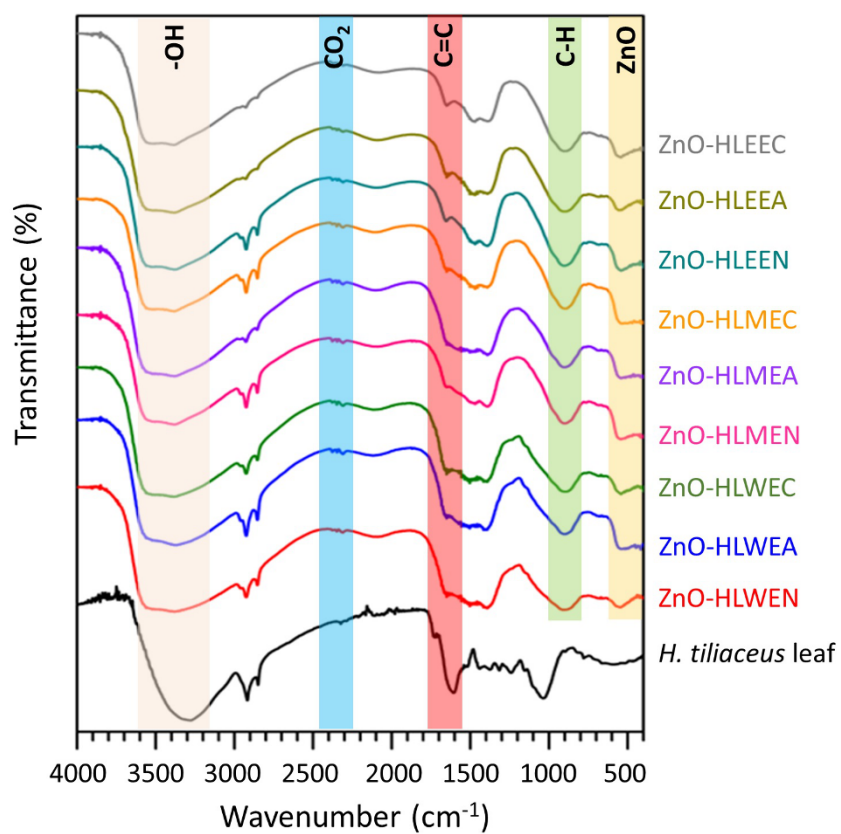

Supplementary file 3. The FTIR spectra of 9 ZnO-NPs with highlights at several peaks.
